# Supplementary material
Source: HighWire-hosted journal article supplement (http://fn.bmj.com/highwire/filestream/150245/field_highwire_adjunct_files/0/fetalneonatal-2011-301470_ds1.pdf)

## Web tables and figure

### **A randomised trial of Granulocyte Macrophage Colony Stimulating Factor for neonatal sepsis: Outcomes at 2 years**

Marlow N, Morris TP, Brocklehurst P, Carr R, Cowan F, Patel N, Petrou S, Redshaw M, Modi N, Doré CJ

### **Contents**

**Web Table 1: PROGRAMS: Comparison of infant and maternal characteristics at trial entry and short term outcomes between children who were or were not followed up at 2 years corrected for gestational age**

**Web Table 2: Comparison of socio-demographic information at 2 years of age corrected for prematurity in PROGRAMS groups.** Denominator indicates the number of children for whom questionnaires were returned

**Web Figure 1: Cost-effectiveness plane, expressed in terms of incremental costs and incremental severe disability-free survival**

**Web Table 1: PROGRAMS: Comparison of infant and maternal characteristics at trial entry and short term outcomes between children who were or were not followed up at 2 years corrected for gestational age**

|                                                                             | Followed up<br>(n = 203) |             | Not followed up<br>(n = 13) |             | Difference<br>or relative<br>risk (RR) | 95% CI for<br>difference<br>or RR |
|-----------------------------------------------------------------------------|--------------------------|-------------|-----------------------------|-------------|----------------------------------------|-----------------------------------|
|                                                                             | n or<br>median           | % or<br>IQR | n or<br>median              | % or<br>IQR |                                        |                                   |
| <b>Characteristics at trial entry</b>                                       |                          |             |                             |             |                                        |                                   |
| Male, n (%)                                                                 | 96                       | 47%         | 6                           | 46%         | 1.0                                    | 0.6 to 1.9                        |
| Age at recruitment, h, median (IQR)                                         | 45                       | 26-62       | 35                          | 20-56       | 4.5                                    | -7 to 19                          |
| Gestational age, weeks, median (IQR)                                        | 29                       | 27-30       | 30                          | 27-31       | -0.6                                   | -1.6 to 0.4                       |
| Birthweight, g, median (IQR)                                                | 815                      | 650-930     | 885                         | 785-1090    | -120                                   | -230 to 10                        |
| Neutrophil count at trial entry, x10 <sup>9</sup> /L, median (IQR)          | 2.7                      | 1.3-4.2     | 2.2                         | 1.3-5.3     | 0                                      | -1.2 to 1.2                       |
| Neutropaenia (<1.1x10 <sup>9</sup> /L) at trial entry, n (%)                | 34/194                   | 18%         | 1/12                        | 8%          | 2.1                                    | 0.3 to 14.1                       |
| Multiple pregnancies, n (%)                                                 | 49/203                   | 24%         | 4/13                        | 31%         | 0.8                                    | 0.3 to 1.8                        |
| Maternal antenatal steroids administered 4 h or more before delivery, n (%) | 163/175                  | 93%         | 11/11                       | 100%        | -                                      | -                                 |
| Infants given surfactant within 4 h of birth, n (%)                         | 146/161                  | 91%         | 6/7                         | 86%         | 1.1                                    | 0.8 to 1.4                        |
| Cranial ultrasound findings at trial entry                                  |                          |             |                             |             |                                        |                                   |
| Normal                                                                      | 158/197                  | 80%         | 12/13                       | 92%         |                                        |                                   |
| Minor abnormality                                                           | 33/197                   | 17%         | 0/13                        | 0%          |                                        |                                   |
| Severe abnormality                                                          | 6/197                    | 3%          | 1/13                        | 8%          |                                        |                                   |
| <b>Short term outcomes</b>                                                  |                          |             |                             |             |                                        |                                   |
| Necrotising enterocolitis (confirmed at surgery or post mortem)             | 6                        | 3%          | 0                           | 0%          | -                                      | -                                 |
| Sepsis: culture positive to day 28 from trial entry                         | 48                       | 24%         | 3                           | 23%         | 1.0                                    | 0.4 to 2.8                        |
| Sepsis: culture positive and probable to day 28                             | 63                       | 31%         | 5                           | 38%         | 0.8                                    | 0.4 to 1.7                        |
| Cranial ultrasound findings                                                 |                          |             |                             |             |                                        |                                   |
| Normal                                                                      | 131/173                  | 76%         | 8/10                        | 80%         |                                        |                                   |
| Minor abnormality                                                           | 28/173                   | 16%         | 2/10                        | 20%         |                                        |                                   |
| Severe abnormality                                                          | 14/173                   | 8%          | 0/10                        | 0%          |                                        |                                   |
| Oxygen dependency at day 28, n (%)                                          | 126                      | 62%         | 5                           | 38%         | 1.6                                    | 0.8 to 3.2                        |
| Oxygen dependency at 36 weeks PMA, n (%)                                    | 97                       | 48%         | 3                           | 23%         | 2.1                                    | 0.8 to 5.6                        |

For categorical variables summary measures are number, %, relative risk and 95% confidence interval (CI). For continuous variables summary measures are median, interquartile range (IQR), difference and 95% CI. The denominator is the entire population, unless otherwise stated, where data were missing.

**Web Table 2: Comparison of socio-demographic information at 2 years of age corrected for prematurity in PROGRAMS groups.** Denominator indicates the number of children for whom questionnaires were returned

| Variable                                                           | GM-CSF (n = 72)<br>n (%)<br>or mean (sd) | Control (n = 75)<br>n (%).<br>or mean (sd) |
|--------------------------------------------------------------------|------------------------------------------|--------------------------------------------|
| <u>Marital status</u>                                              |                                          |                                            |
| Married                                                            | 49/71 (69)                               | 46 (61)                                    |
| Living with partner                                                | 13/71 (18)                               | 19 (26)                                    |
| Single                                                             | 9/71 (13)                                | 10 (13)                                    |
| Biological parents at home                                         | 59/70 (84)                               | 62/74 (84)                                 |
| <u>Housing</u>                                                     |                                          |                                            |
| Home owner                                                         | 41/56 (73)                               | 45/59 (76)                                 |
| Rooms in home, median (IQR)                                        | 5 (3 – 6)                                | 5 (3 – 6)                                  |
| Use of telephone                                                   | 66/71 (93)                               | 72 (96)                                    |
| Use of car                                                         | 61/71 (86)                               | 64 (86)                                    |
| <u>Mother's qualifications</u>                                     |                                          |                                            |
| O Level/GCSE/equivalent or lesser*                                 | 36/71 (51)                               | 30 (41)                                    |
| <u>Parental employment status</u>                                  |                                          |                                            |
| Mother working                                                     | 33/69 (48)                               | 36 (48)                                    |
| Mother in full time education                                      | 0/71 (0)                                 | 2 (3)                                      |
| Mother not working                                                 | 36/71 (51)                               | 37 (49)                                    |
| Father working                                                     | 57 (79)                                  | 62 (83)                                    |
| Index of multiple deprivation (2007) †<br>median (IQR) percentile) | n = 60<br>19 (10-33)                     | n = 55<br>17 (10-33)                       |

Notes:

† Based on postcode, Includes only children resident in England

\* Maximum qualifications for school leaver at age 16

**Web figure 1: Cost-effectiveness plane, expressed in terms of incremental costs and incremental severe disability-free survival**

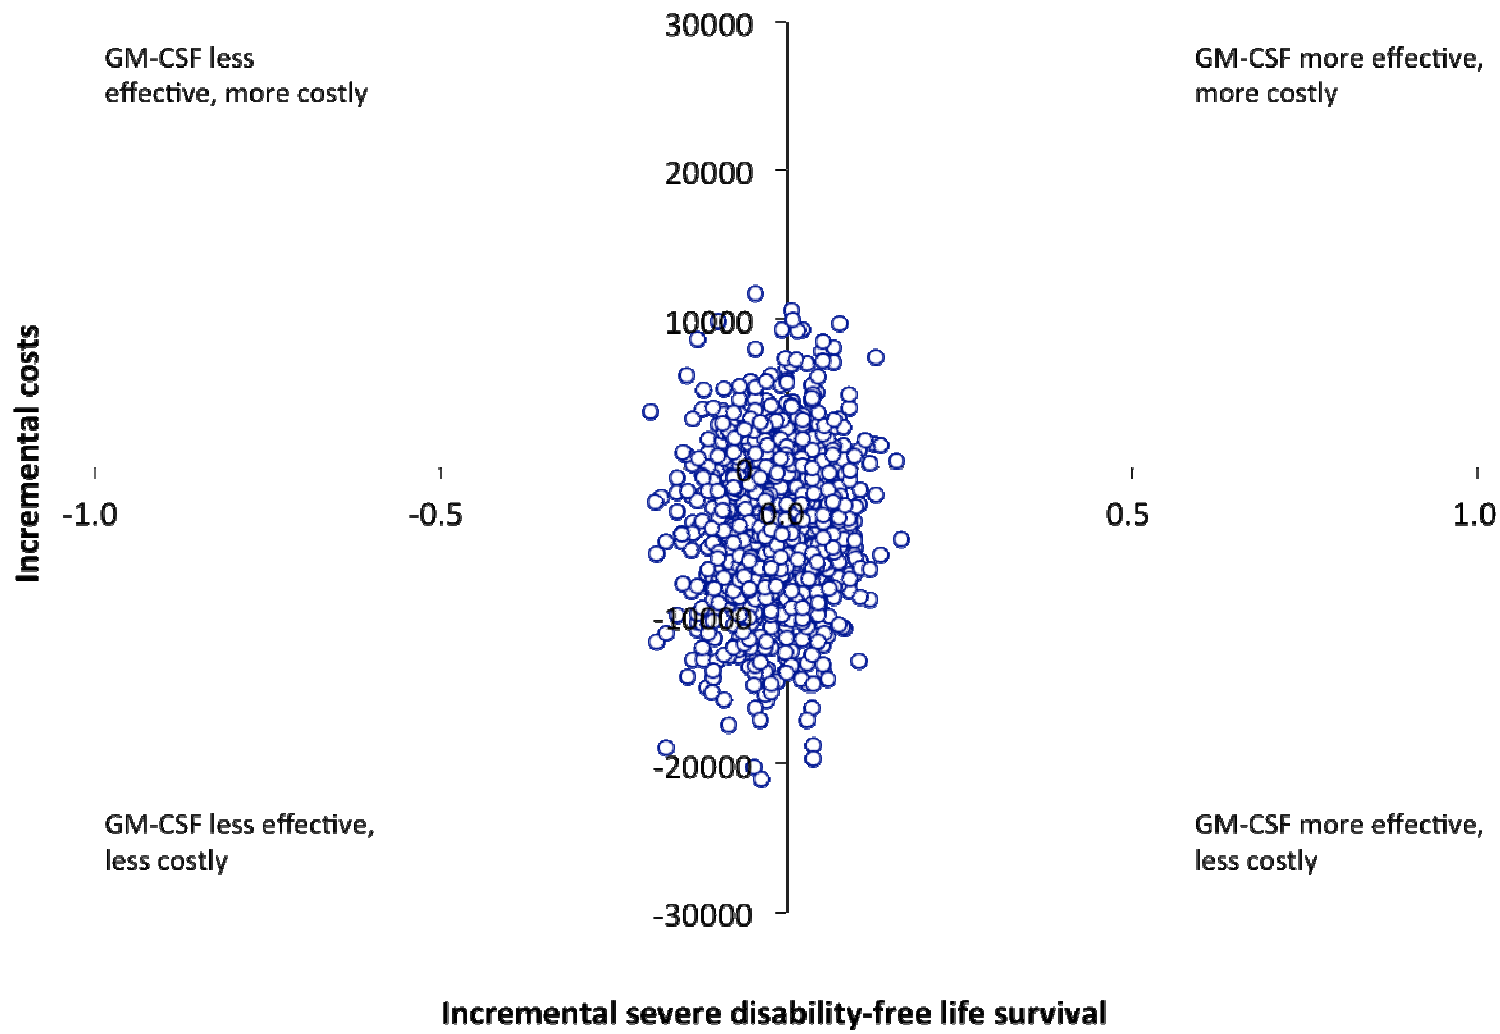

Supplement: fetalneonatal-2011-301470_ds1.pdf [file fetalneonatal-2011-301470_ds1.pdf]
